# Supplementary material
Source: ML conference proceedings conference paper supplement (https://openreview.net/forum?id=ludEV7dK9G)

TNB101-Macro-Jigsaw (Kendall's  $\tau$ : 0.3644)

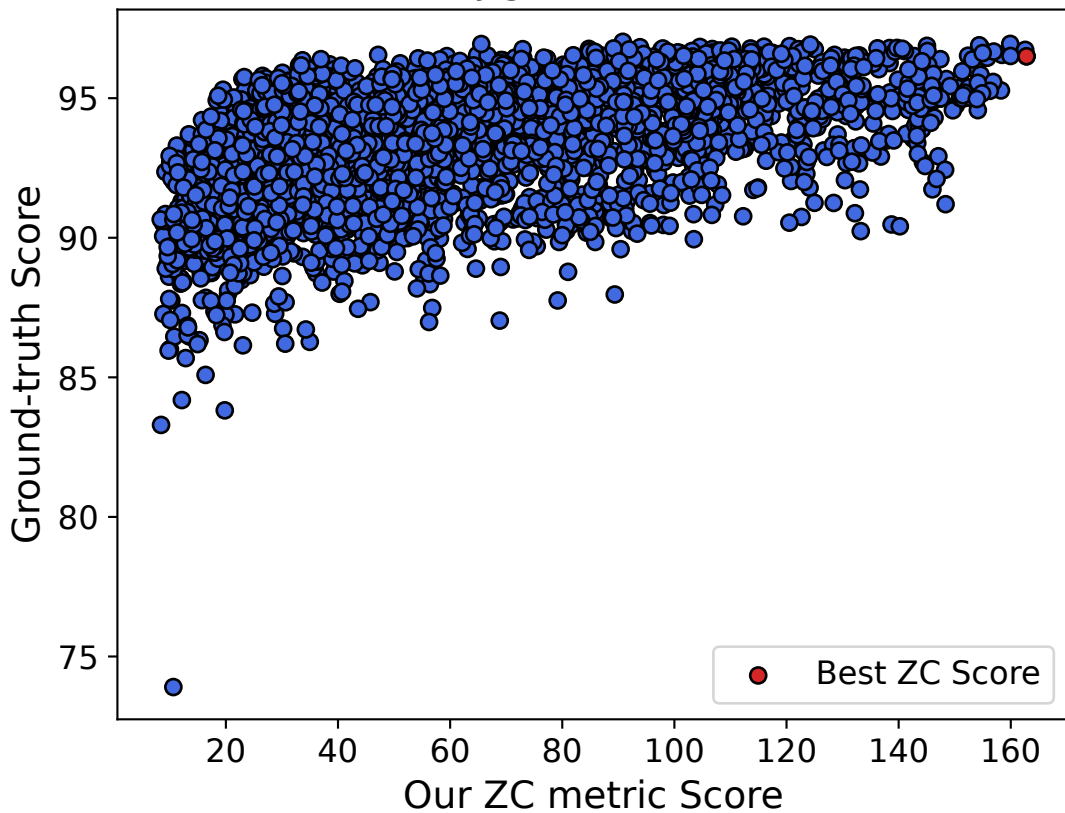

Supplement: supplementary_material [file attachment]

NB201-CF100 (Kendall's  $\tau$ : 0.7562)

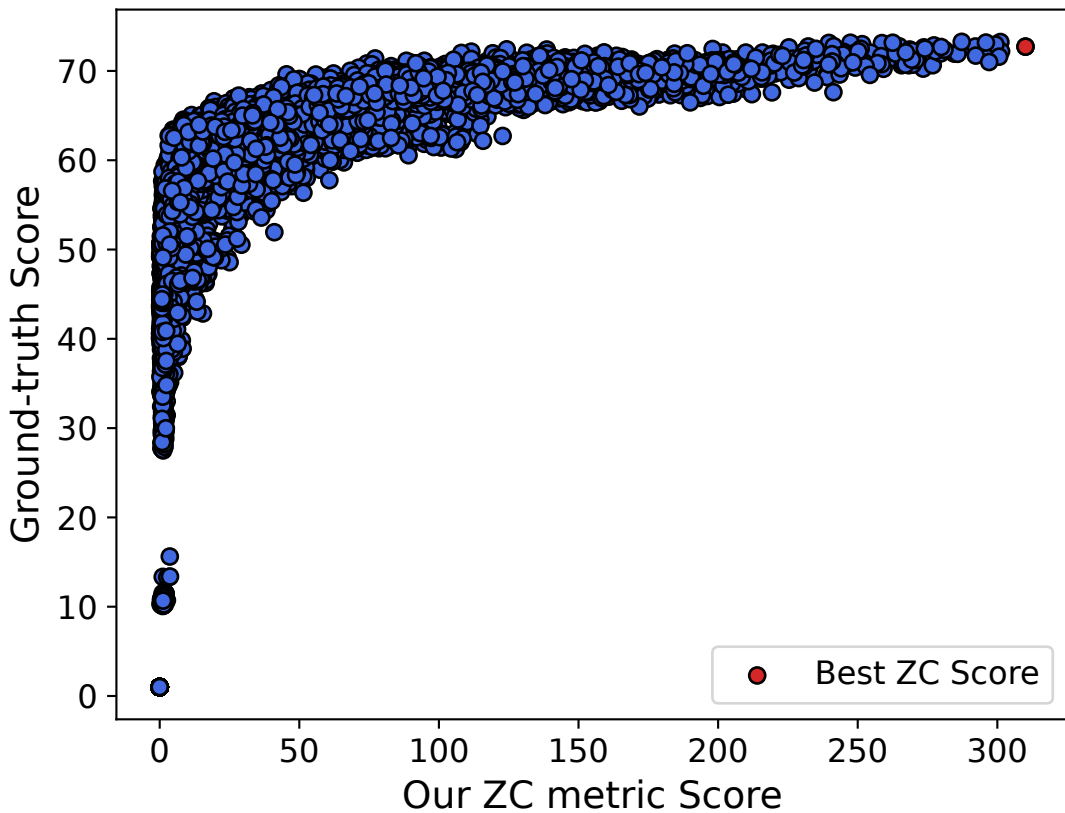

Supplement: supplementary_material [file attachment]

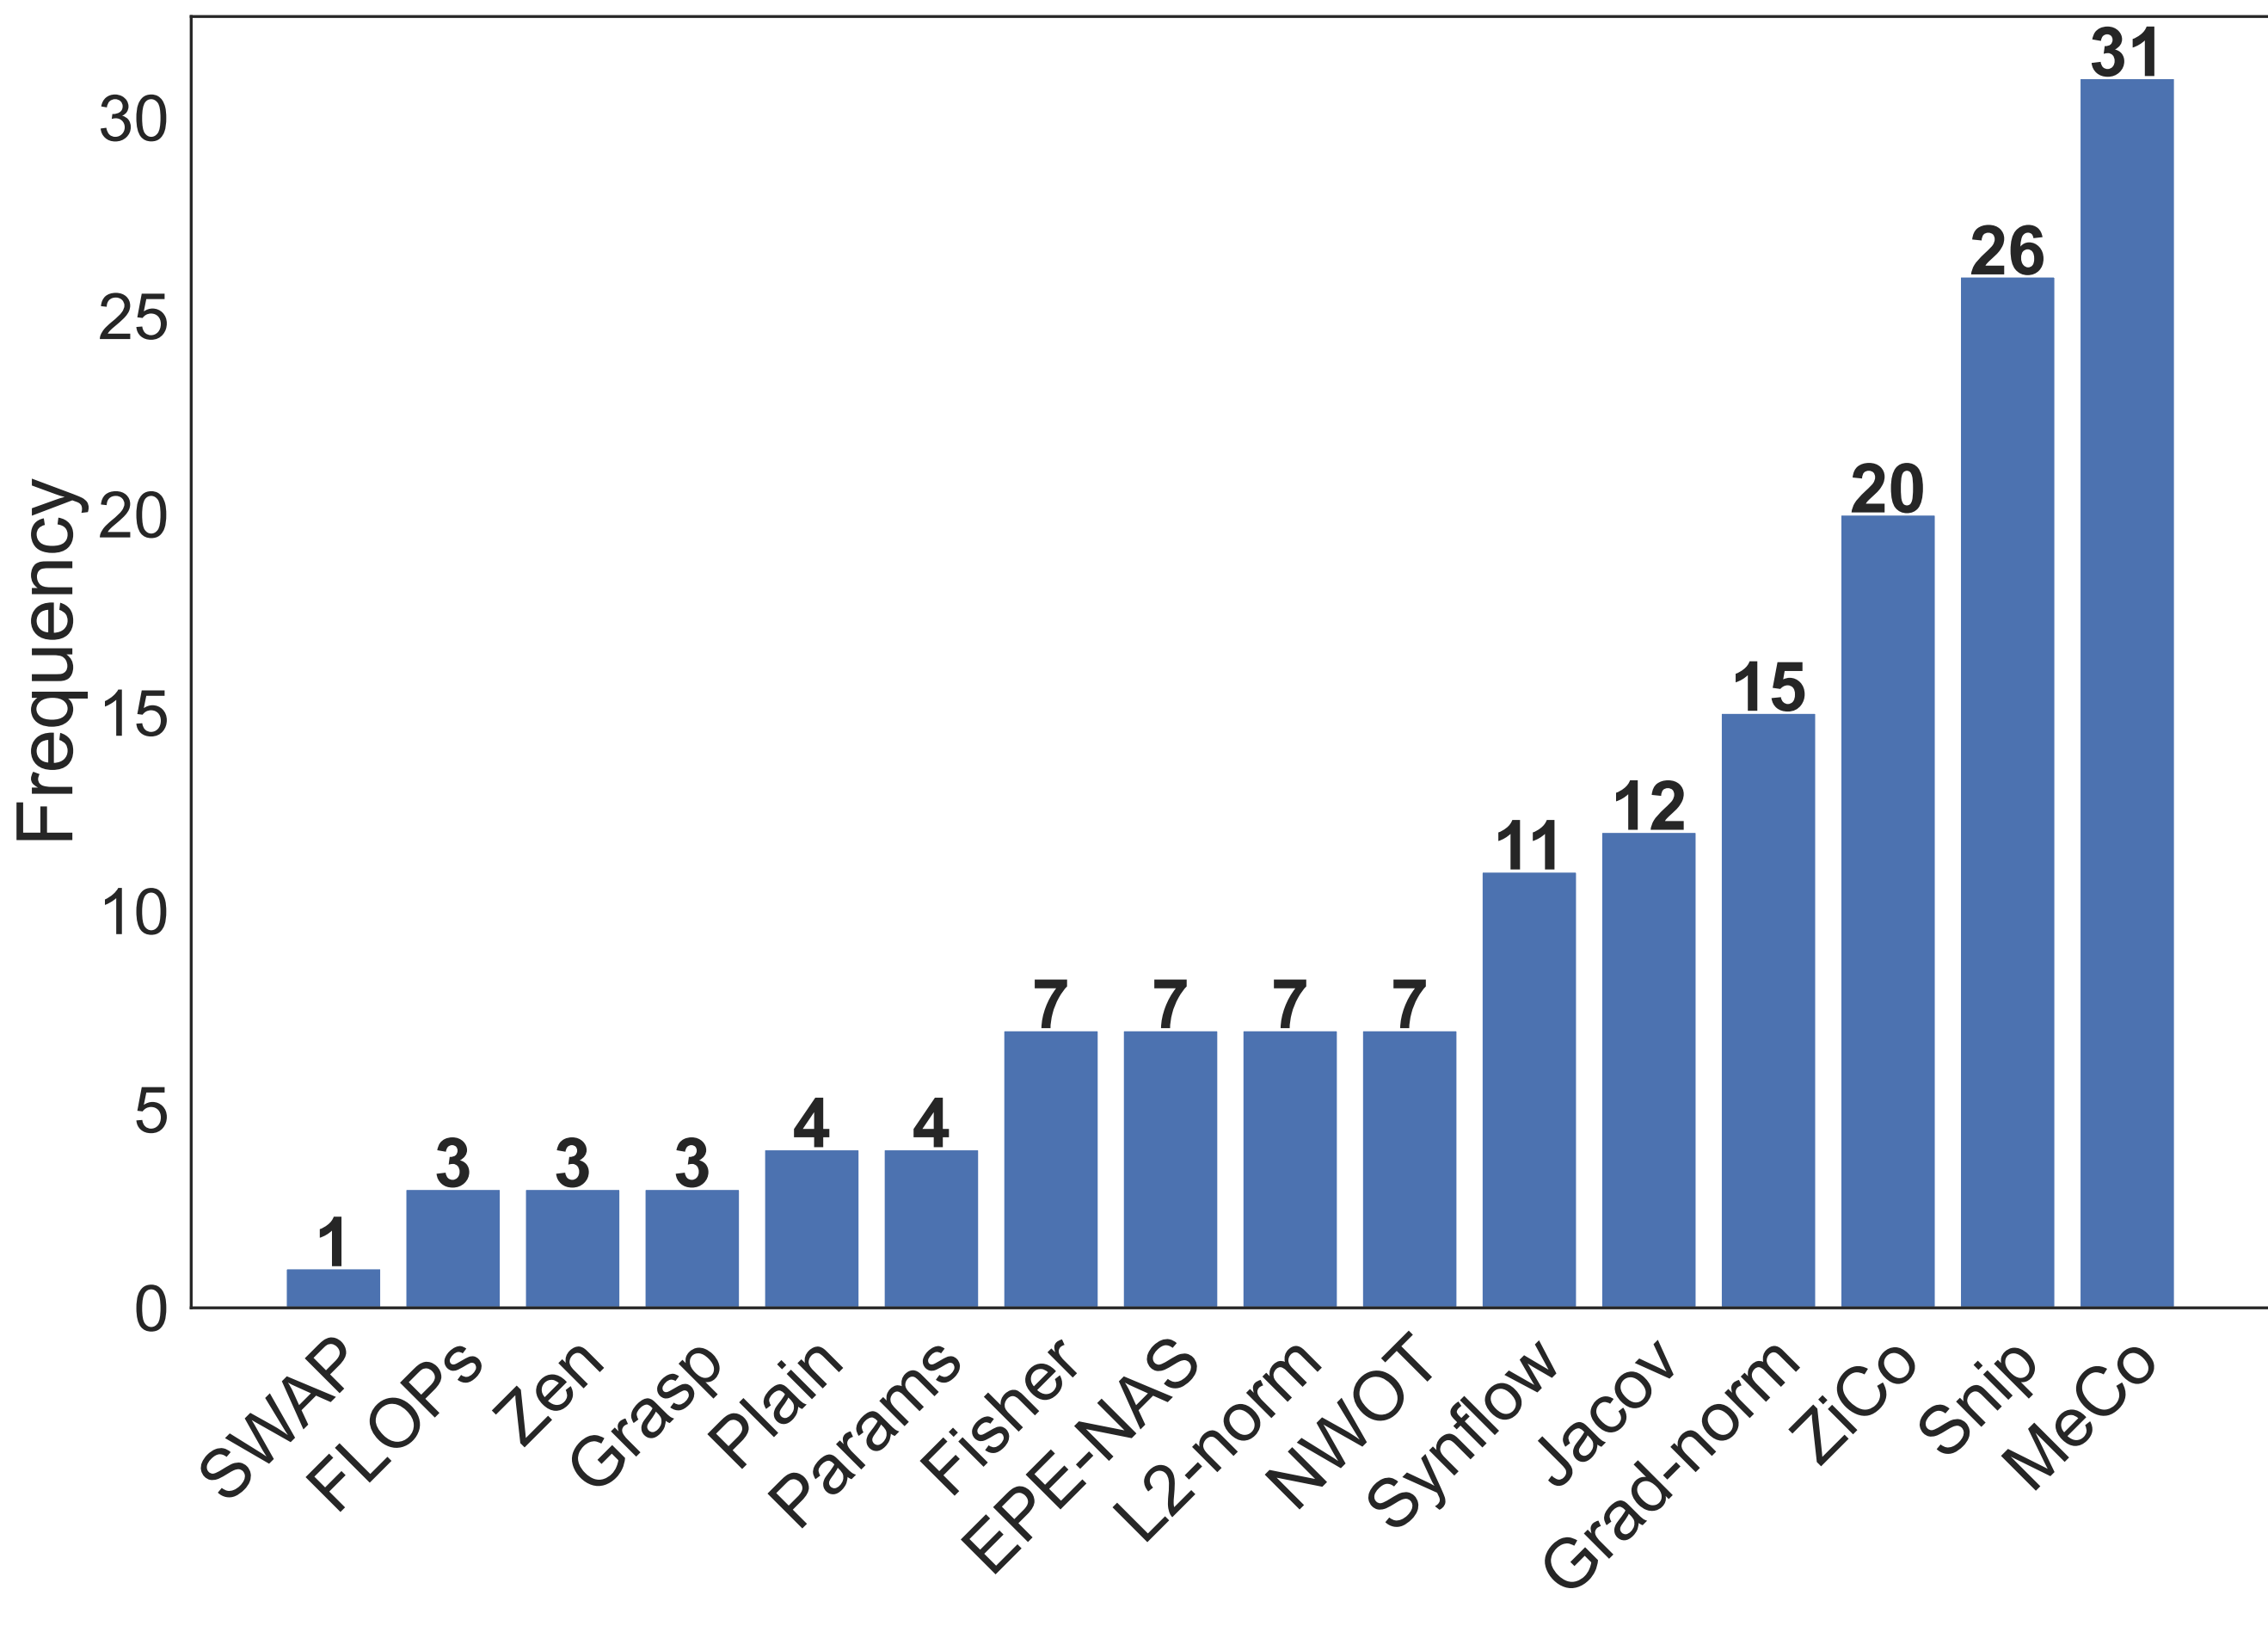

Supplement: supplementary_material [file attachment]

NB201-IMGNT (Kendall's  $\tau$ : 0.7175)

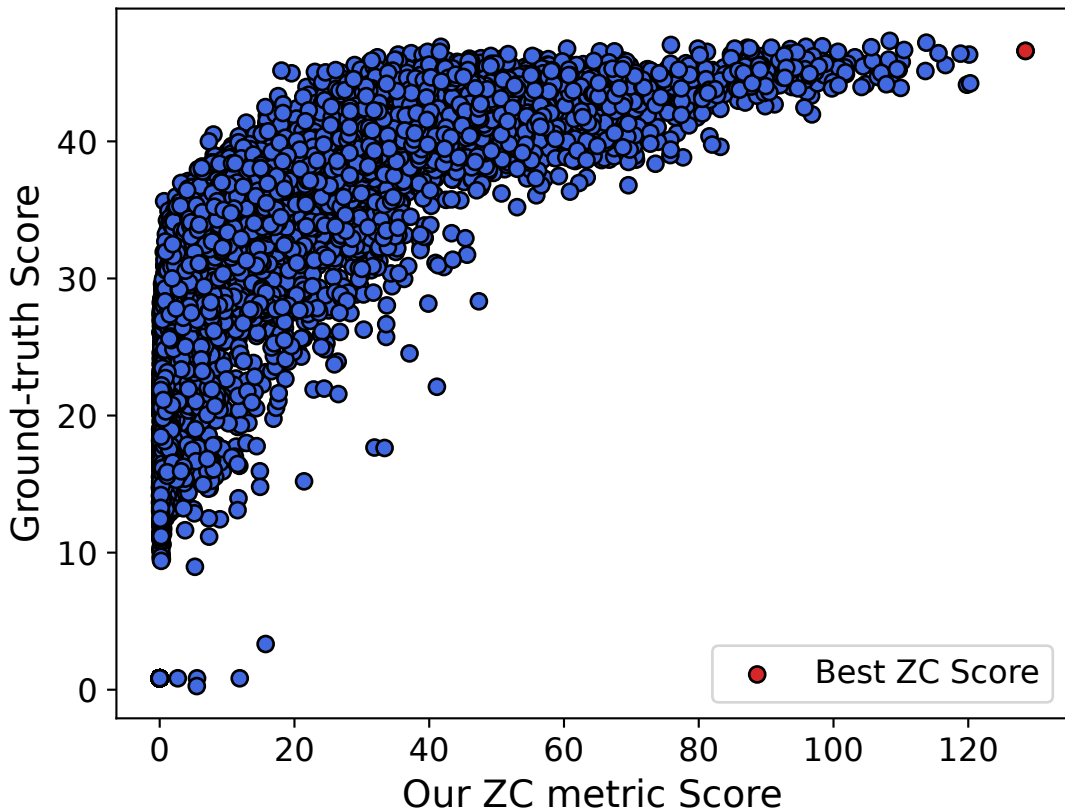

Supplement: supplementary_material [file attachment]

TNB101-Micro-Scene (Kendall's  $\tau$ : 0.4836)

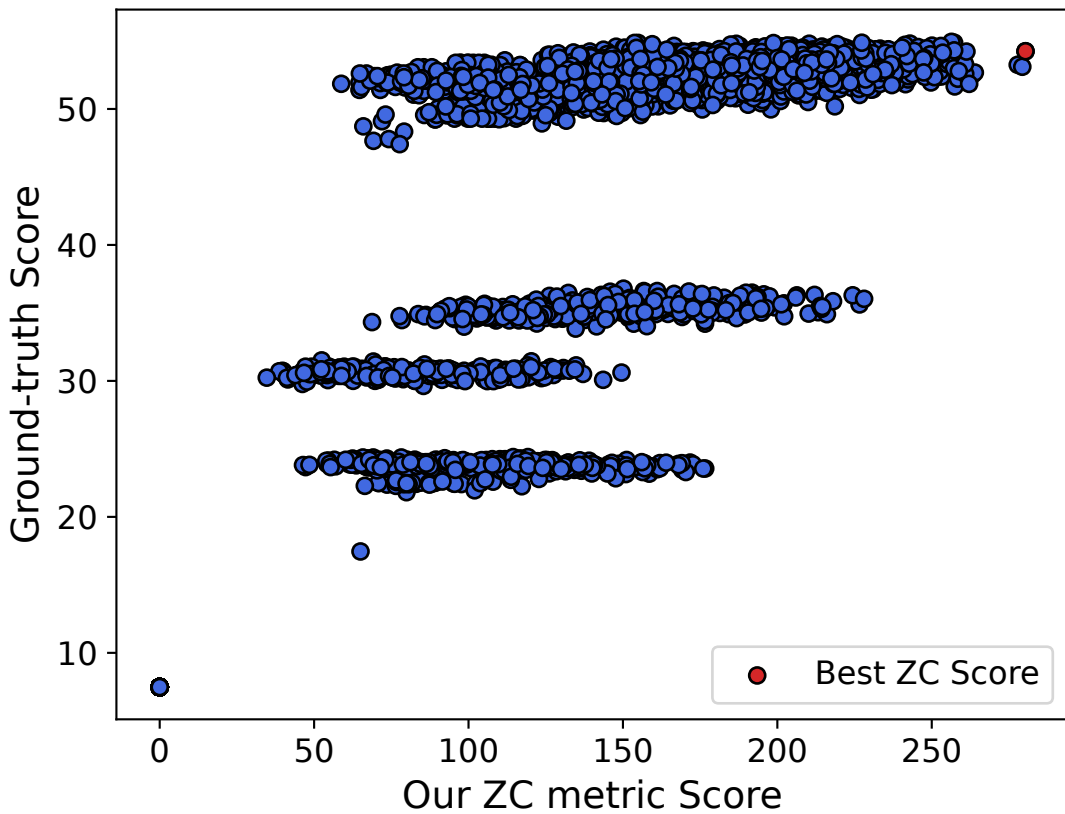

Supplement: supplementary_material [file attachment]

NB201-CF10 (Kendall's  $\tau$ : 0.7610)

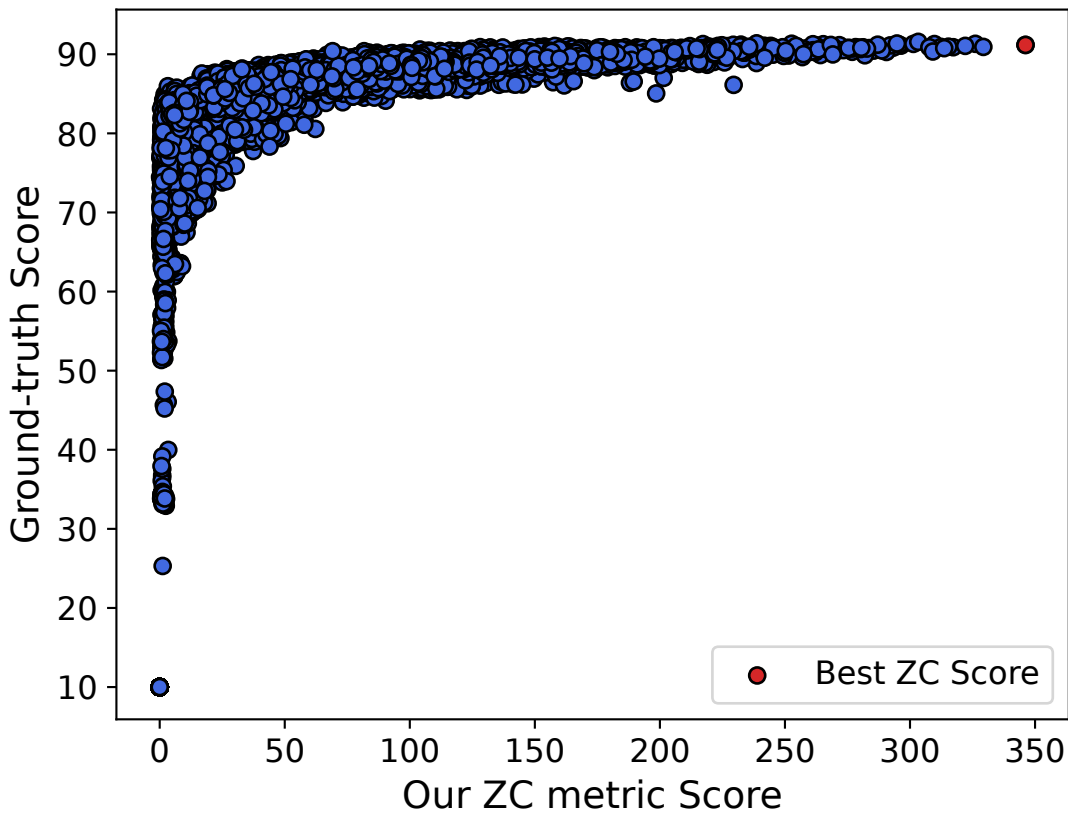

Supplement: supplementary_material [file attachment]

TNB101-Macro-Object (Kendall's  $\tau$ : 0.6008)

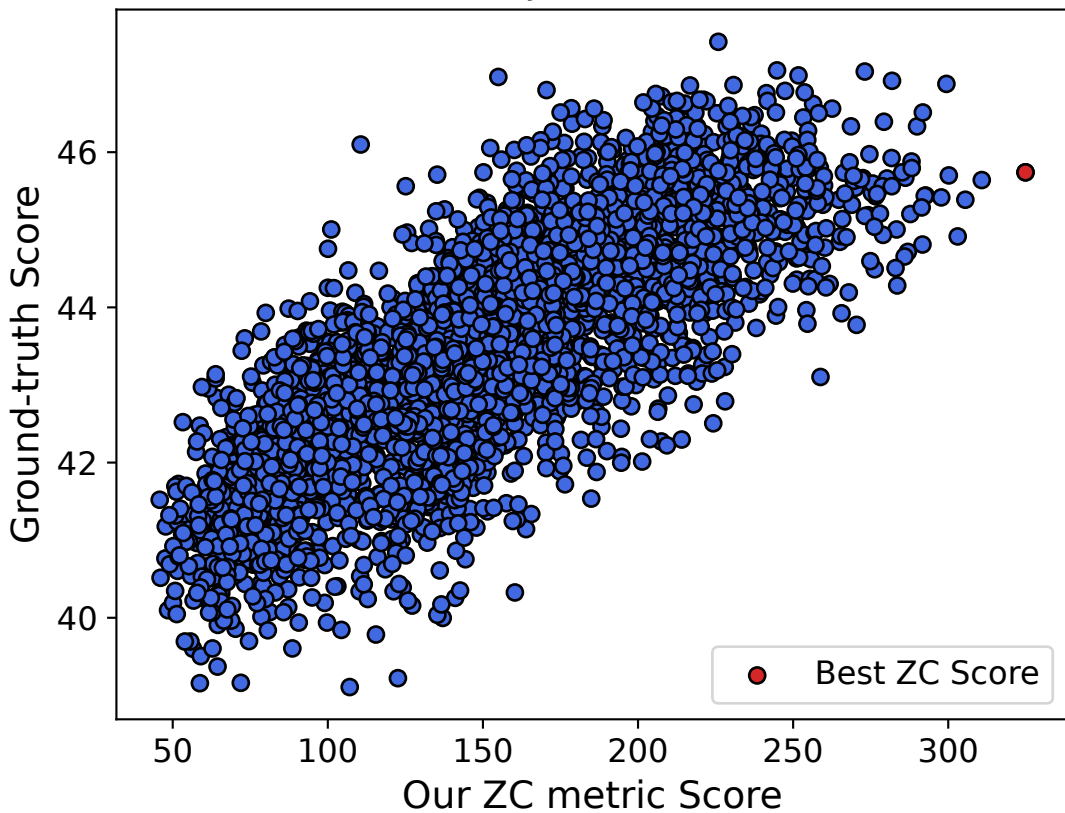

Supplement: supplementary_material [file attachment]

TNB101-Macro-Scene (Kendall's  $\tau$ : 0.5308)

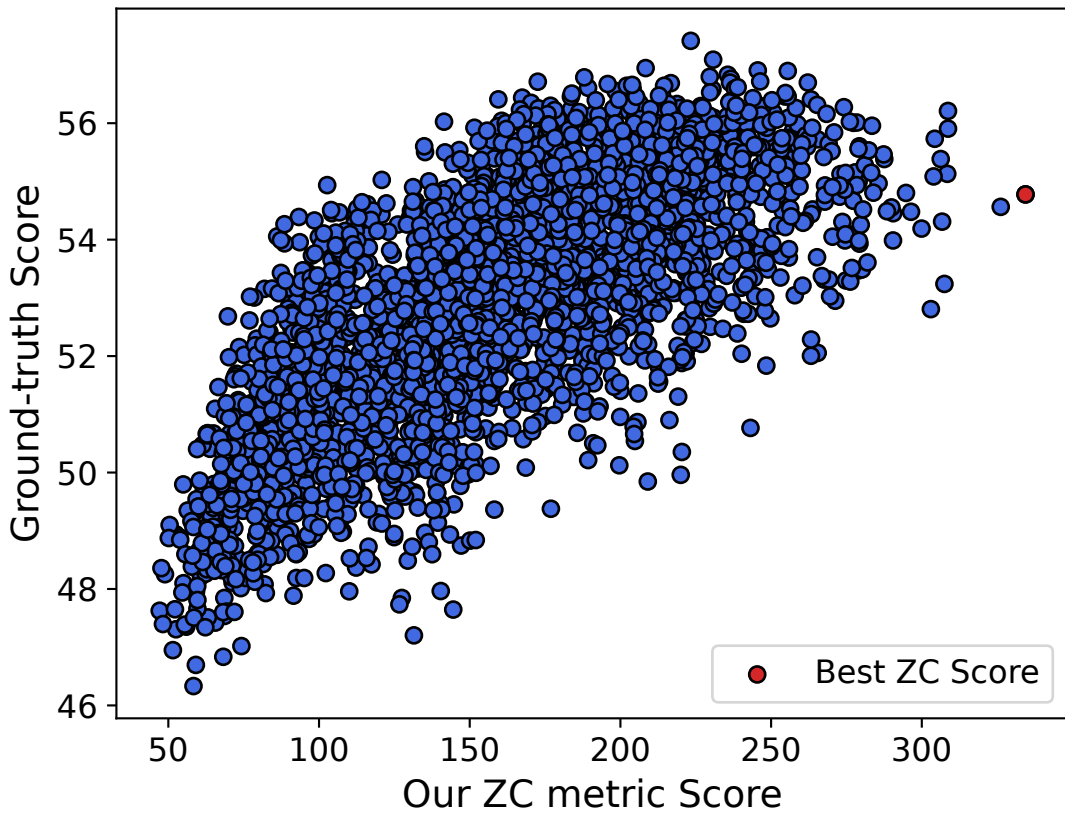

Supplement: supplementary_material [file attachment]

TNB101-Macro-AutoEnc (Kendall's  $\tau$ : 0.4747)

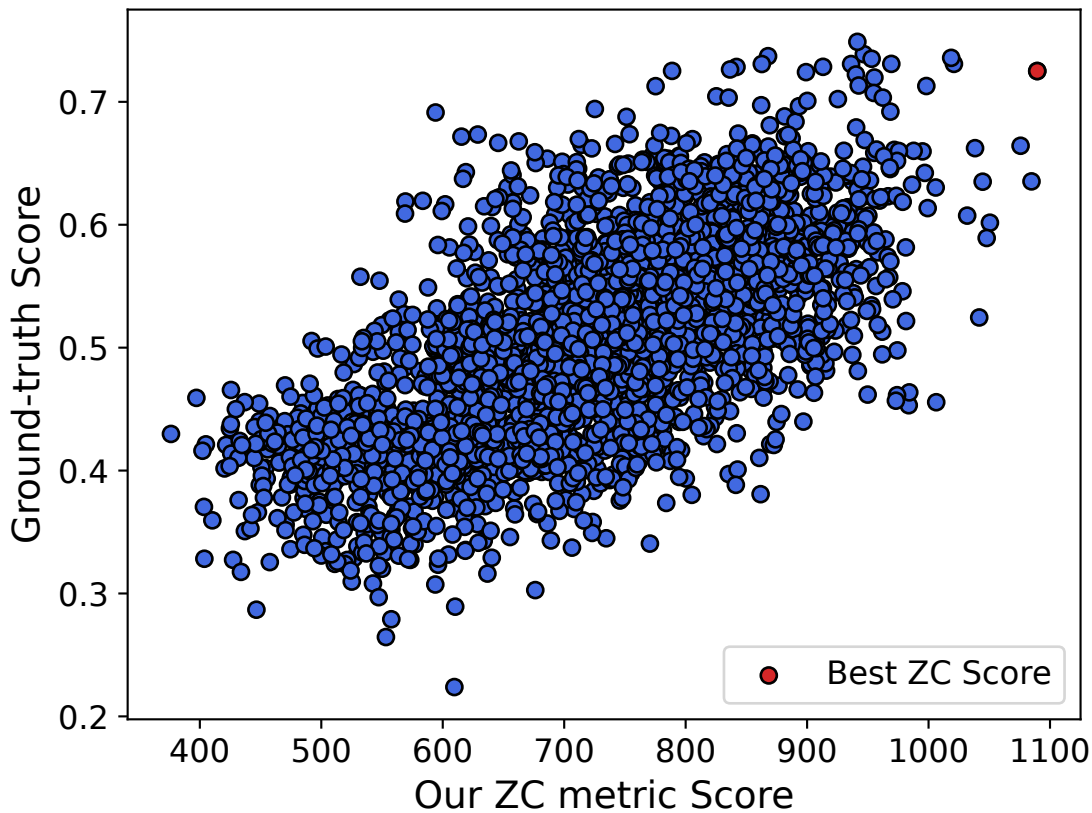

Supplement: supplementary_material [file attachment]

NB101-CF10 (Kendall's  $\tau$ : 0.6145)

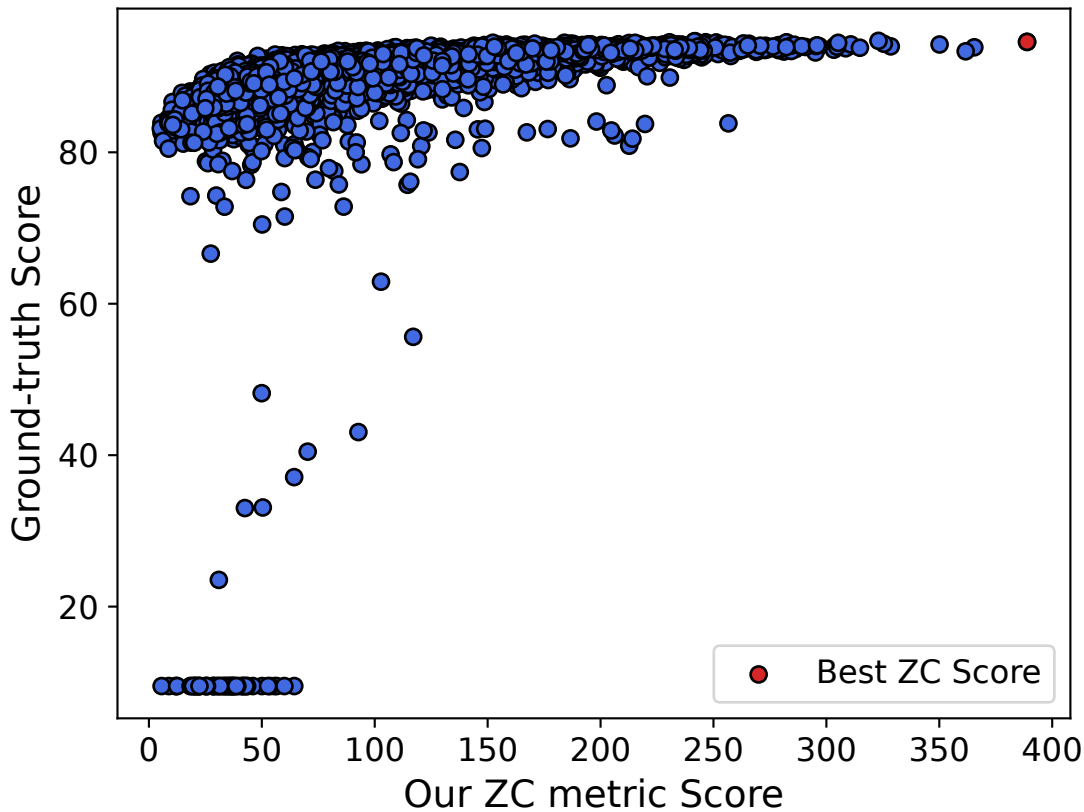

Supplement: supplementary_material [file attachment]

TNB101-Micro-AutoEnc (Kendall's  $\tau$ : 0.3002)

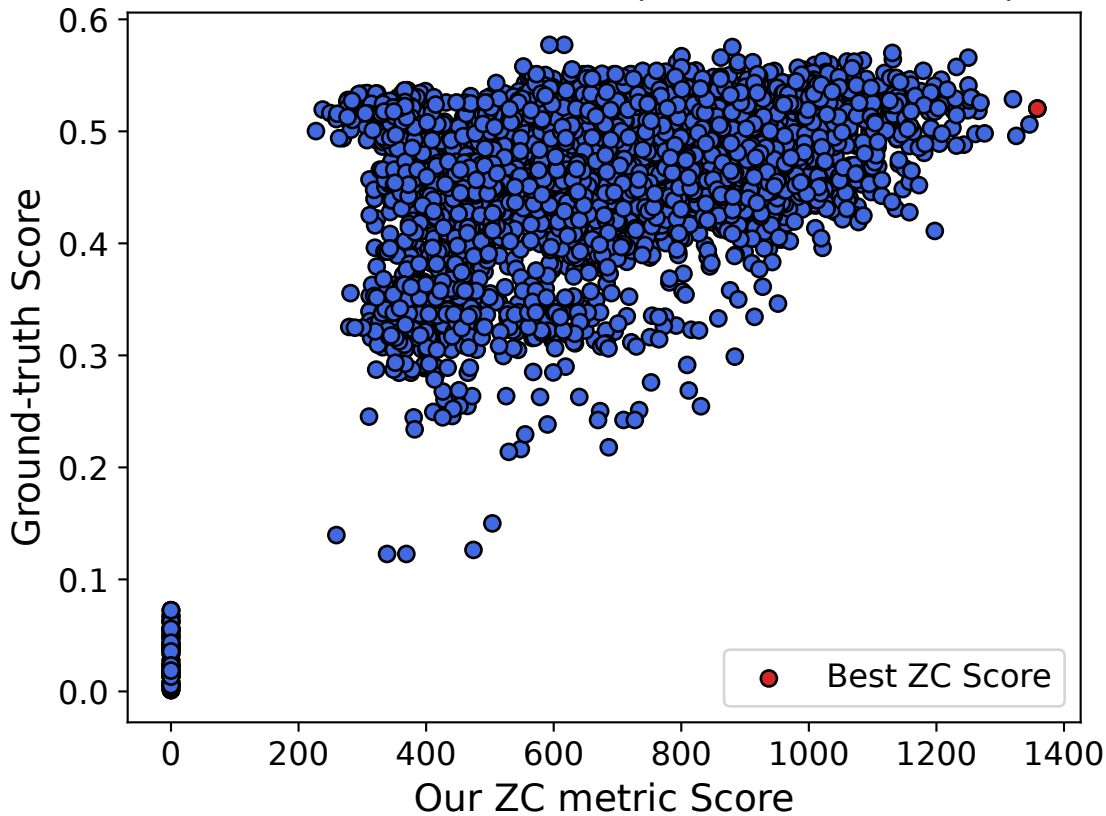

Supplement: supplementary_material [file attachment]

TNB101-Micro-Jigsaw (Kendall's  $\tau$ : 0.4974)

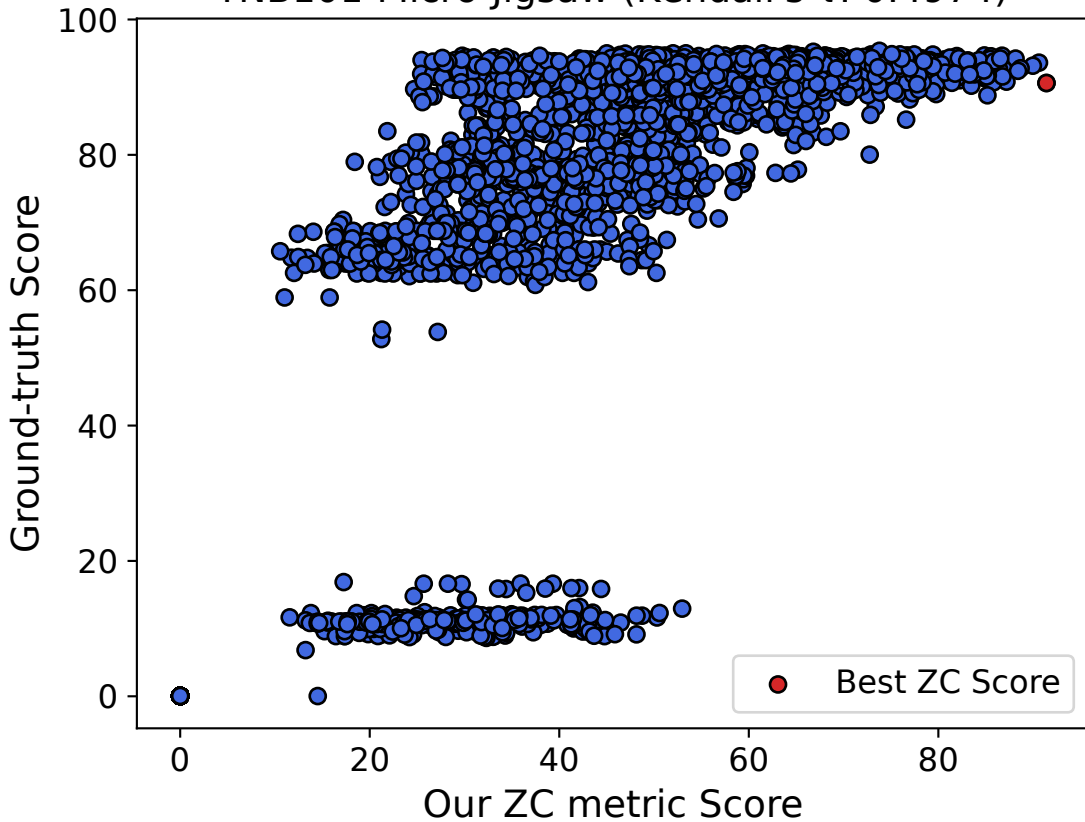

Supplement: supplementary_material [file attachment]

NB301-CF10 (Kendall's  $\tau$ : 0.4014)

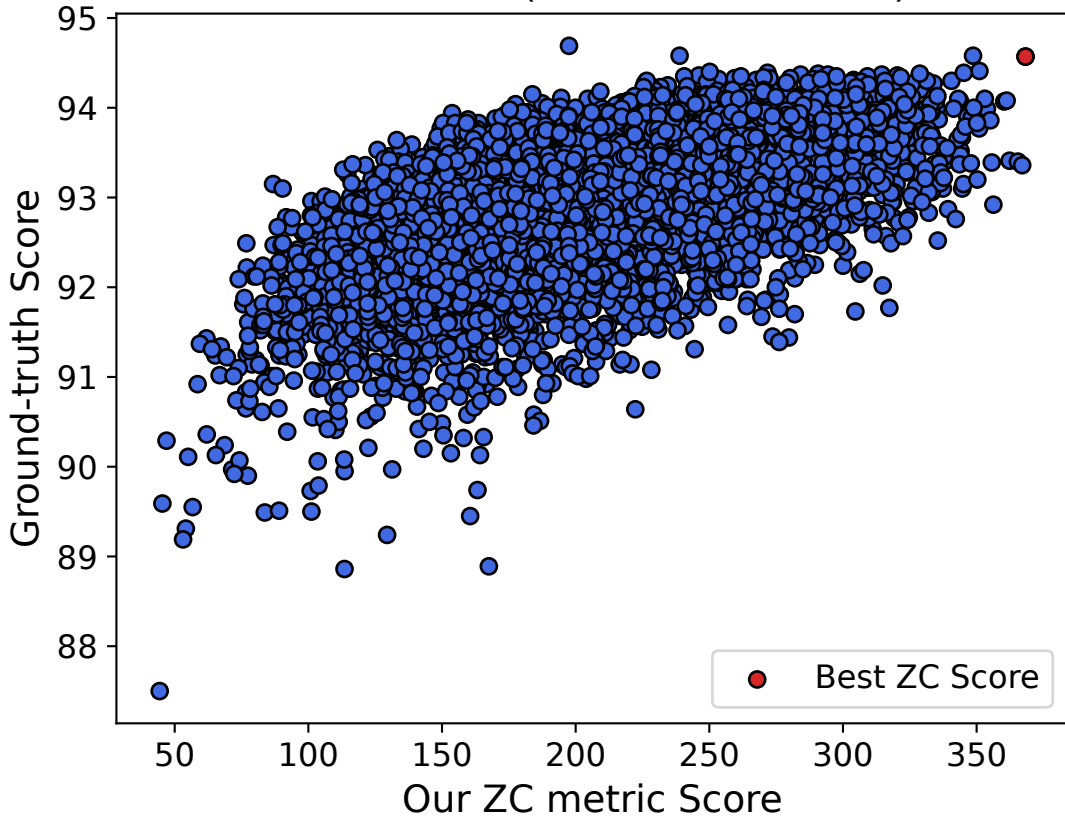

Supplement: supplementary_material [file attachment]

TNB101-Micro-Object (Kendall's  $\tau$ : 0.4207)

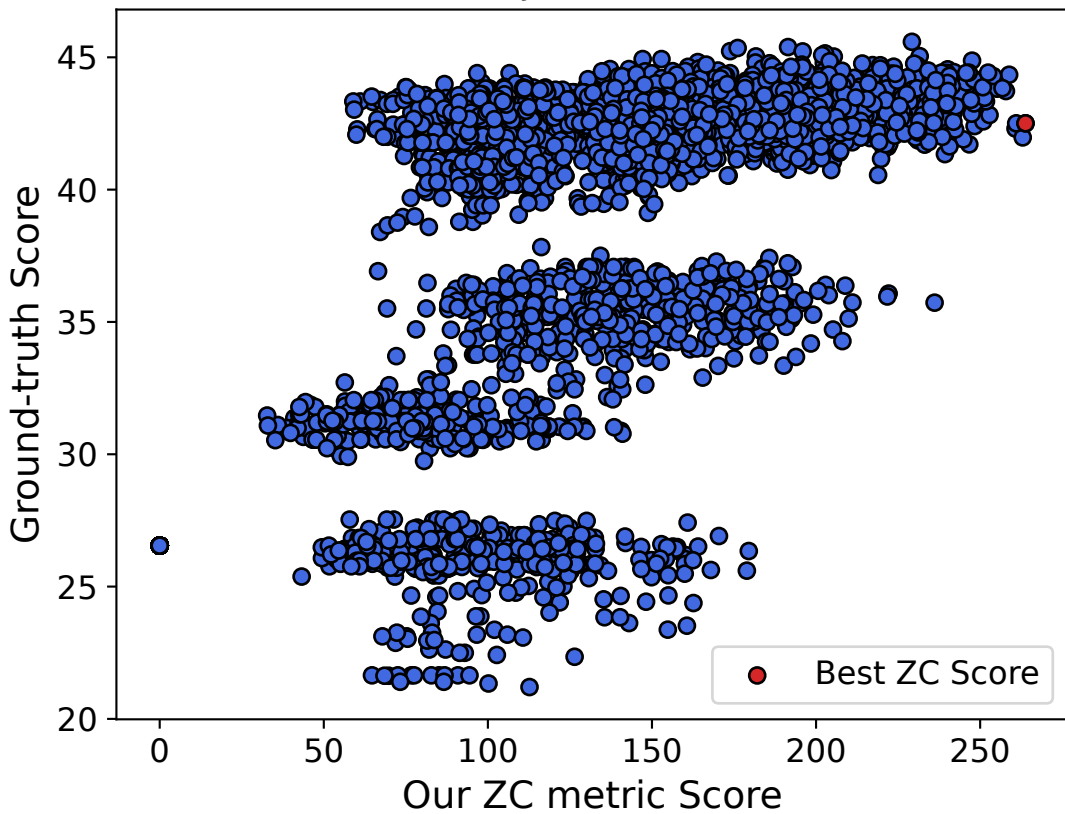

Supplement: supplementary_material [file attachment]
